# Supplementary material for: Calcium Transport Mechanisms of PC12 Cells
Source: PubMed Central journal article supplement — J Gen Physiol. 2008 Apr;131(4):307–23. doi: 10.1085/jgp.200709915 (PMC2279173; doi:10.1085/jgp.200709915), 2008-04
Supplement: jgenphysiol_jgp.200709915_3.pdf [file jgenphysiol_jgp.200709915_3.pdf]

**Duman et al,** <http://www.jgp.org/cgi/doi/10.1085/jgp.200709915>

### Provenance of PC12 Cells

The PC12 D19 cells came from Dr. Sandra Bajjalieh (University of Washington) who obtained them from Dr. Thomas F.J. Martin (University of Wisconsin). The D19 strain had been selected much earlier by subcloning in the Martin lab for numerous secretory granules and for robust depolarization-induced calcium responses and was used in all exocytosis studies of the Martin lab. The PC12 cell stock came to Wisconsin from Dr. Erik Schwietzer and the Regis Kelly lab at UCSF where they had been conditioned to grow on supplemented DMEM. We thank Dr. Martin for tracing this history for us.

### Computer Program for Local Depletion Calculations

```
//Program written for IGOR Pro (WaveMetrics, Lake Oswego, OR)
#pragma rtGlobals=1          // Use modern global access method.
Function DoItAll() //This function runs all caculations
    PCheck()
    PDiffuse()
end

Function pCheck() //set up arrays but stop before integrating
    PlanarArrays()
    FirstpFlux()
end

//*****
//*****
//-----calculate diffusion regimes for a one dimensional planar problem
// December 18, 2007 B.H.
Function PlanarArrays ()          //defines waves and initializes values

    variable /g plim = 50 //length of waves (number of compartments)
    Make /O/N = (plim) dist, pflux, ptheory, topBuff, pBflux
    Make /O/D/ N = (plim) pcCa, pMCA, pcCaBuff, pMCABuff          //note double precision
    ptheory = 0
    Variable/g dx = 0.02 //thickness in um per compartment
    variable cnt
    //variable MolecPeruM = 6.022e23*1.e-6*1.e-15
    //print MolecPeruM // answer is 602 molecules per cubic um in a 1 uM solution
    variable pCaInit =1          //starting concentration, units uM
    pcCa = pCaInit          //initialize cytoplasmic Ca
    //pcCa[0] = 10000          //implement this when checking instantaneous point source
    dist = dx/2          //distance from origin (origin = membrane)
    dist += p*dx
    cnt = 0
    pMCA = pcCa * dx          //volume assumes 1 um by 1 um square cylinder
    //pMCA is molar quantity in compartment (units umol/1.e15 = 1.e-21 mol)
    variable /g BuffFactor = 300          //Ca binding ratio, kappa
    pMCABuff = BuffFactor* pMCA          //equilibrate Ca-bound buffer moles
```

```

pcCaBuff = pMcaBuff/dx          //Ca-bound buffer concentration

variable /g StartMass
StartMass = sum (pmca) + sum (pmcabuff)    //total free and bound calcium in system
end

Function FirstpFlux()          //calculates fluxes for first step to check step size
WAVE dist, pcCa, pMca, pflux, ptheory, pcCaBuff, pMcaBuff, topBuff, pBFlux
variable /g plim                //number of compartments
variable/g D = 0.3e3            //diff coefficient in um2/s. Note: 1.e-5 cm2/s = 1000 um2/s
variable/g pdt = 0.2e-7        //small time step of integration in sec
//for 0.02 um compartment widths, pdt can be as high as 200 ns
//above that the calculation is not stable
variable /g dx
variable cnt = 0

do
    pFlux[cnt] = -pdt * D * (pcCa[cnt] - pcCa[cnt+1]) /dx    //assume 1 um2 area
    Cnt += 1

while (cnt < plim)
pFlux[plim] = 0
end

//-----integrate diffusion in time
Function PDiffuse()          //Big repetitive integration of diffusion (Euler method)
WAVE dist, pcCa, pMca, pflux, ptheory, pcCaBuff, pMcaBuff, TopPBuff, pBFlux
variable /g plim                //number of compartments
variable/g D
variable pbDFactor = 1          // value of 1 means Ca buffer diffuses as fast as free Ca
nvar dx, pdt
variable cnt
variable t = 0
variable /g now =datetime
variable BuffOn, Buffoff, PumpOut, extruded
variable /g BuffFactor
BuffOff = 3.3 * pdt            //reciprocal of this rate constant is residence time in sec
BuffOn = BuffOff*BuffFactor
variable pdtDdx = pdt*D/dx, pdtbDdx = pdtDdx * pbDFactor
PumpOut = 127*pdt              // sink at origin = pumping, units 1.e-21 mol/s
do
    //step through time
    cnt = 0
    do
        //calculate fluxes
        pFlux[cnt] = -pdtDdx * (pcCa[cnt] - pcCa[cnt+1])
        pBFlux[cnt] = -pdtbDdx * (pcCaBuff[cnt] - pcCaBuff[cnt+1])
        TopPBuff[cnt] = BuffOn * pMca[cnt] - BuffOff * pMcaBuff[cnt]
        Cnt += 1
    while (cnt < plim)

    pMca[0] += -PumpOut        //make a sink at origin = pumping, units 1.e-21 mol/s

    cnt = 0
    do
        //increment mass and concentrations
        pMca[cnt] += pFlux[cnt] - TopPBuff[cnt]
        pMca[cnt+1] += -pFlux[cnt]
        pCCa[cnt] = pMca[cnt] / dx

```

```

pMcaBuff[cnt] += pBFlux[cnt] + ToPBuff[cnt]
pMcaBuff[cnt+1] += -pBFlux[cnt]
pCCaBuff[cnt] = pMcaBuff[cnt] / dx

Cnt += 1
while (cnt < plim)

t +=pdt

while (t <100000*pdt) // insert number of time iterations here

extruded = PumpOut*t/pdt
variable /g now
print datetime - now, "seconds;", " extruded", extruded// timing of calculations
variable temp1, temp2, Mass = 0 //----solve analytical diffusion equation for point source
cnt = 0
Mass = sum (pmca) //total; of free calcium
cnt = 0
do //increment distance in evaluating analytic solution
Temp1 = exp( -(dist[cnt])^2)/(4*D*t)
Temp2 = (4*pi*D*t)^0.5
pTheory[cnt] = 2* Mass * Temp1/Temp2//factor of 2 for hemisphere
cnt += 1
while (cnt < plim)

Mass = sum (pmca) + sum (pmcabuff) //total; of free and bound calcium
variable /g StartMass
print StartMass, "dMass", StartMass-Mass,"t", t-pdt, "[Ca]", pcCa[0], pcCa[plim-1],"D", D,
D*pbDFactor,"K", BuffFactor, buffoff/pdt
end

```
